# Supplementary material for: RNA-Seq Analysis of Influenza A Virus-Induced Transcriptional Changes in Mice Lung and Its Possible Implications for the Virus Pathogenicity in Mice
Source: MDPI journal article supplement (doi:10.3390/v13102031), 2021-10-08
Supplement: s1 [file s1]

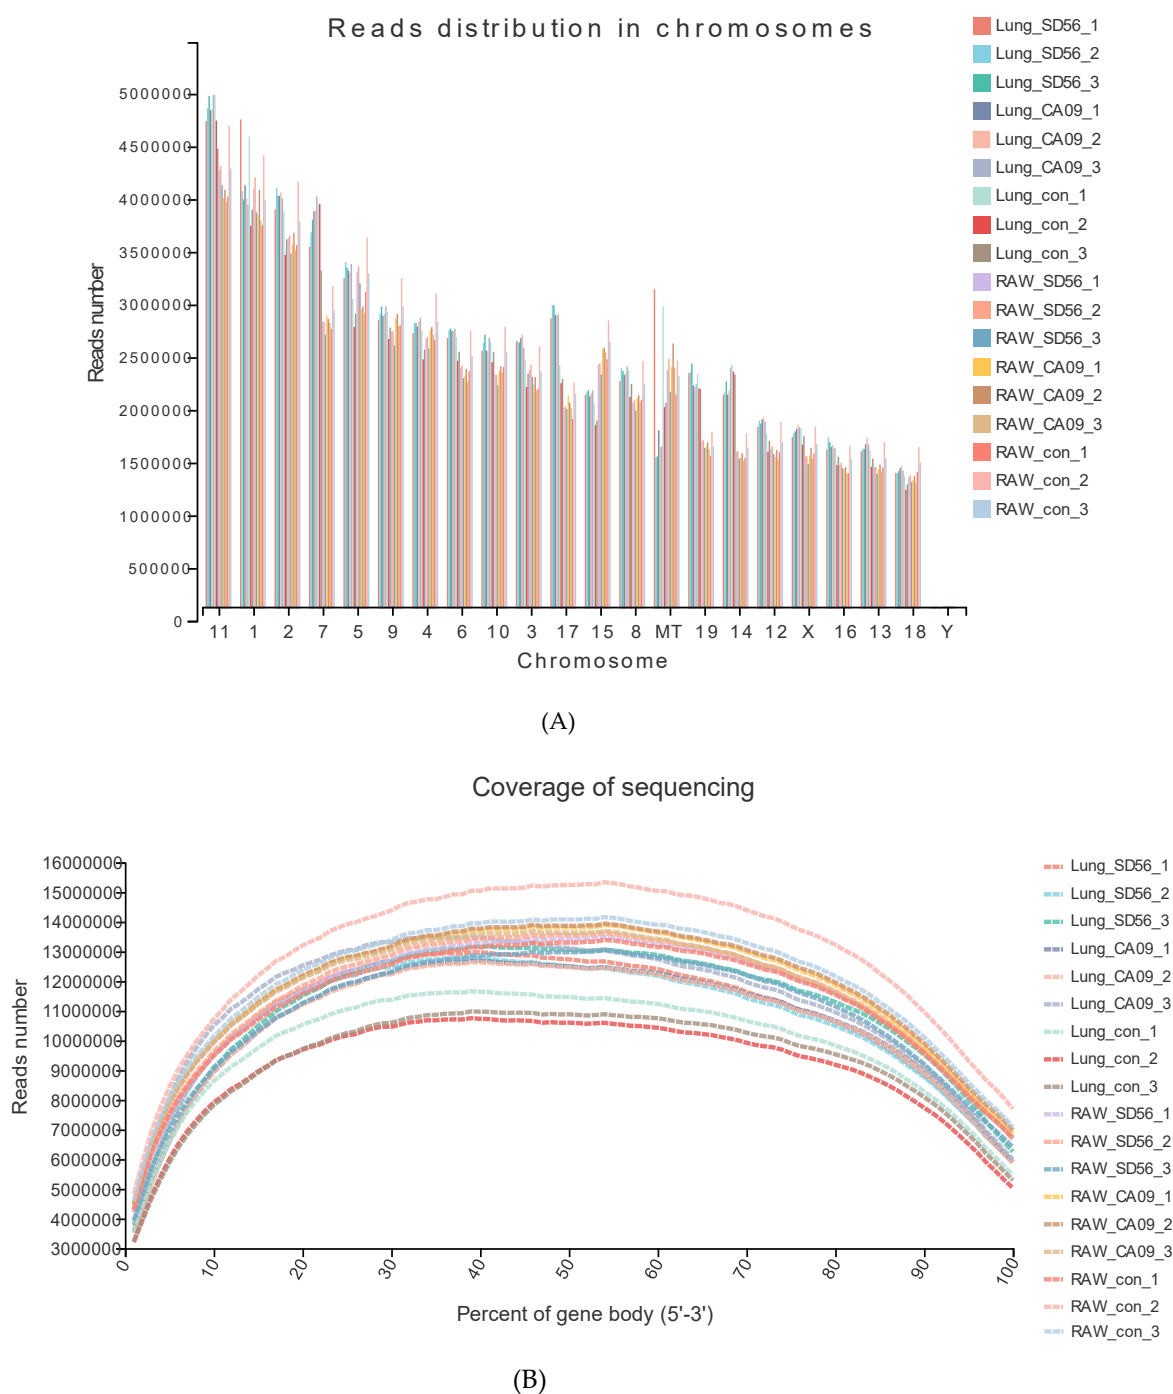

**Figure S1.** Transcriptome quality assessment. The quality of the transcriptome sequencing was assessed using mapped reads. (A) The number of sequences on chromosomes was statistically compared to reflect the distribution of the sequences on each chromosome. (B) Sequencing coverage analysis, the curve reflects whether the sequence obtained by sequencing is evenly distributed on the gene.

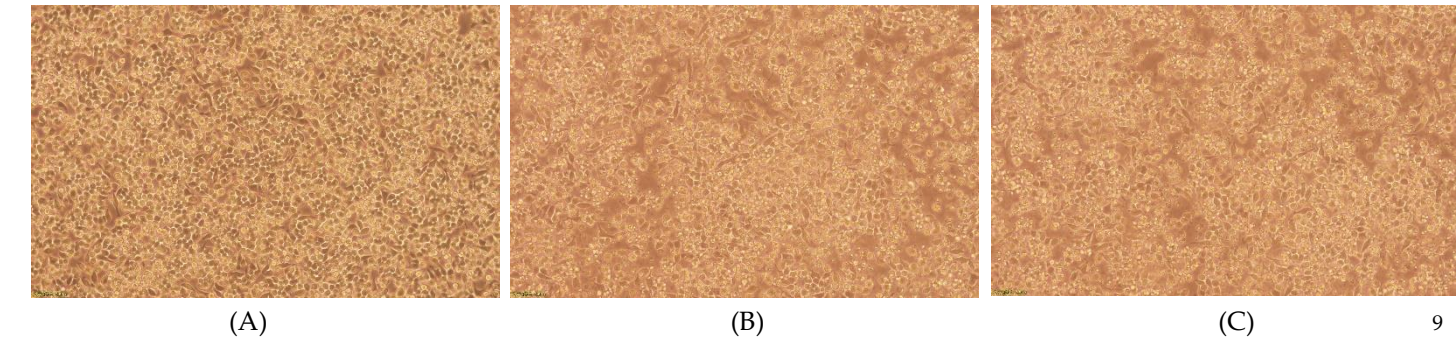

**Figure S2.** Cytopathic effect of RAW264.7 infected with CA09 and SD56. (A) RAW264.7 cells of the uninfected group showed no obvious lesions. (B) RAW264.7 cells in CA09 infected group showed obvious lesions. (C) RAW264.7 cells in SD56 infected group showed obvious lesions. Magnification is 200X.

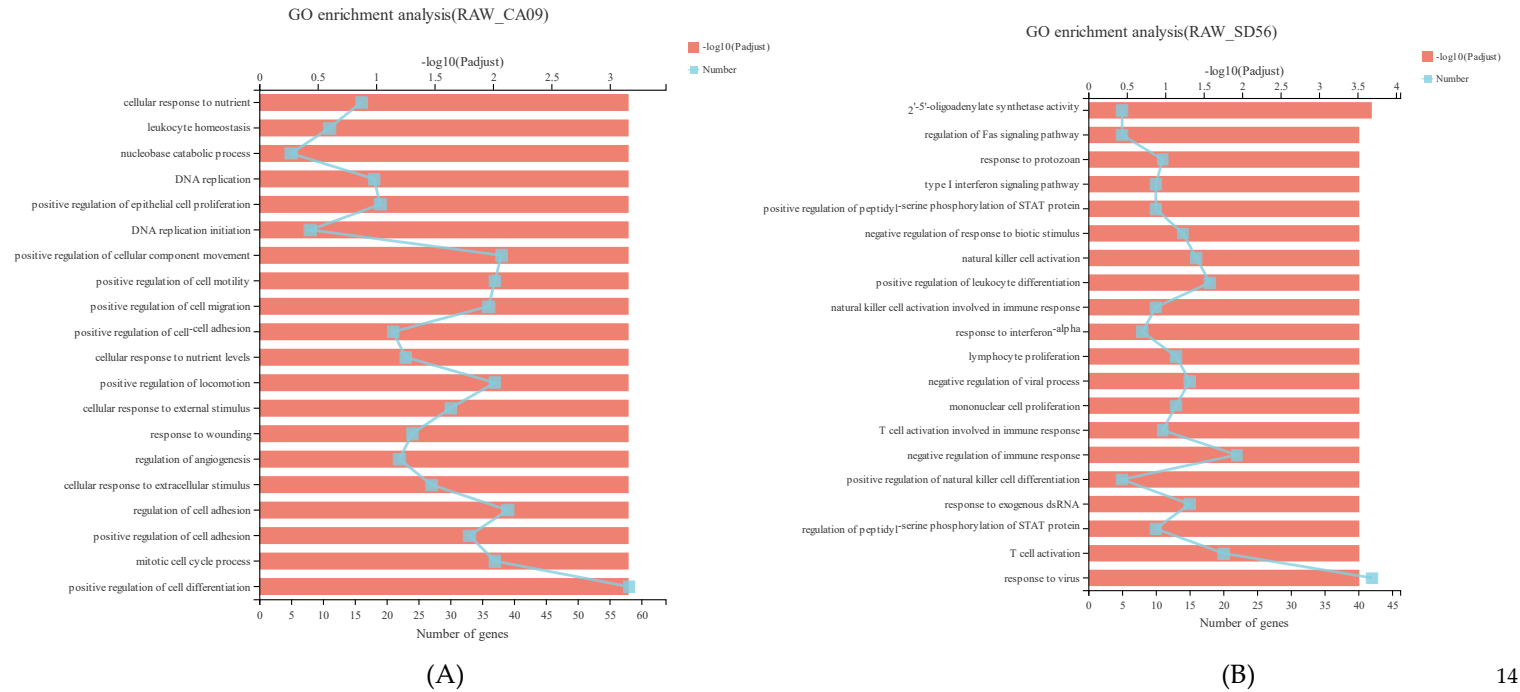

**Figure S3.** GO functional enrichment of differentially expressed genes in RAW264.7.(A) GO analysis of RAW264.7 differentially expressed genes in CA09 relative to the control. (B) GO analysis of RAW264.7 differentially expressed genes in SD56 relative to the control.

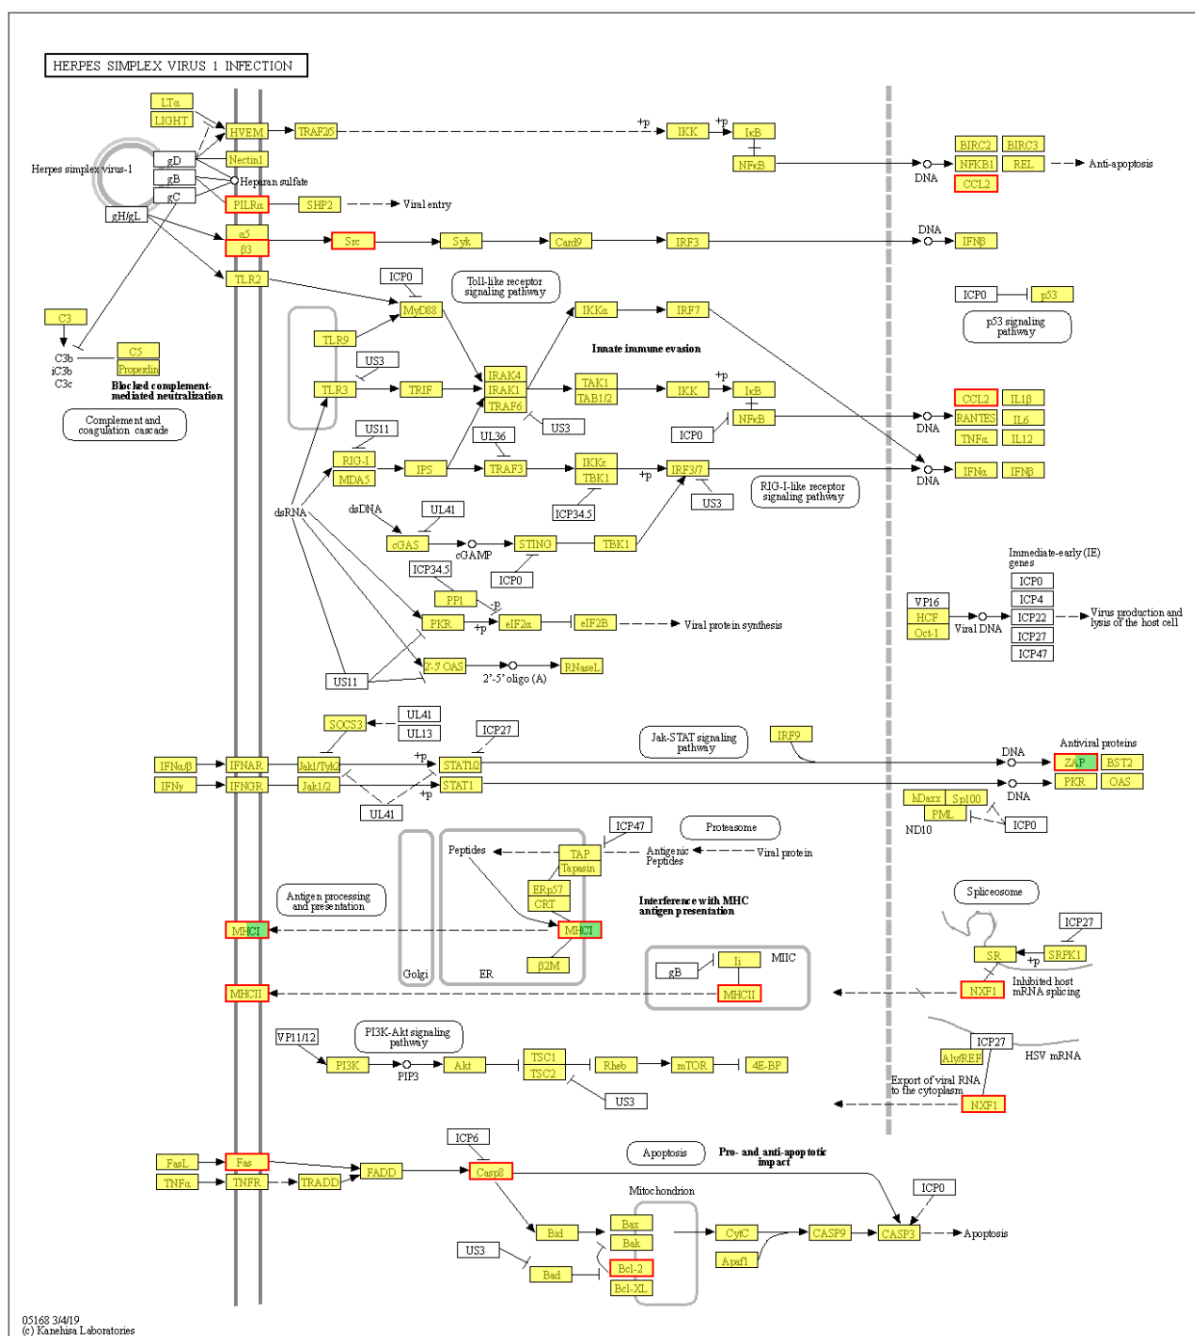

(A)

27  
28  
29  
30  
31  
32  
33

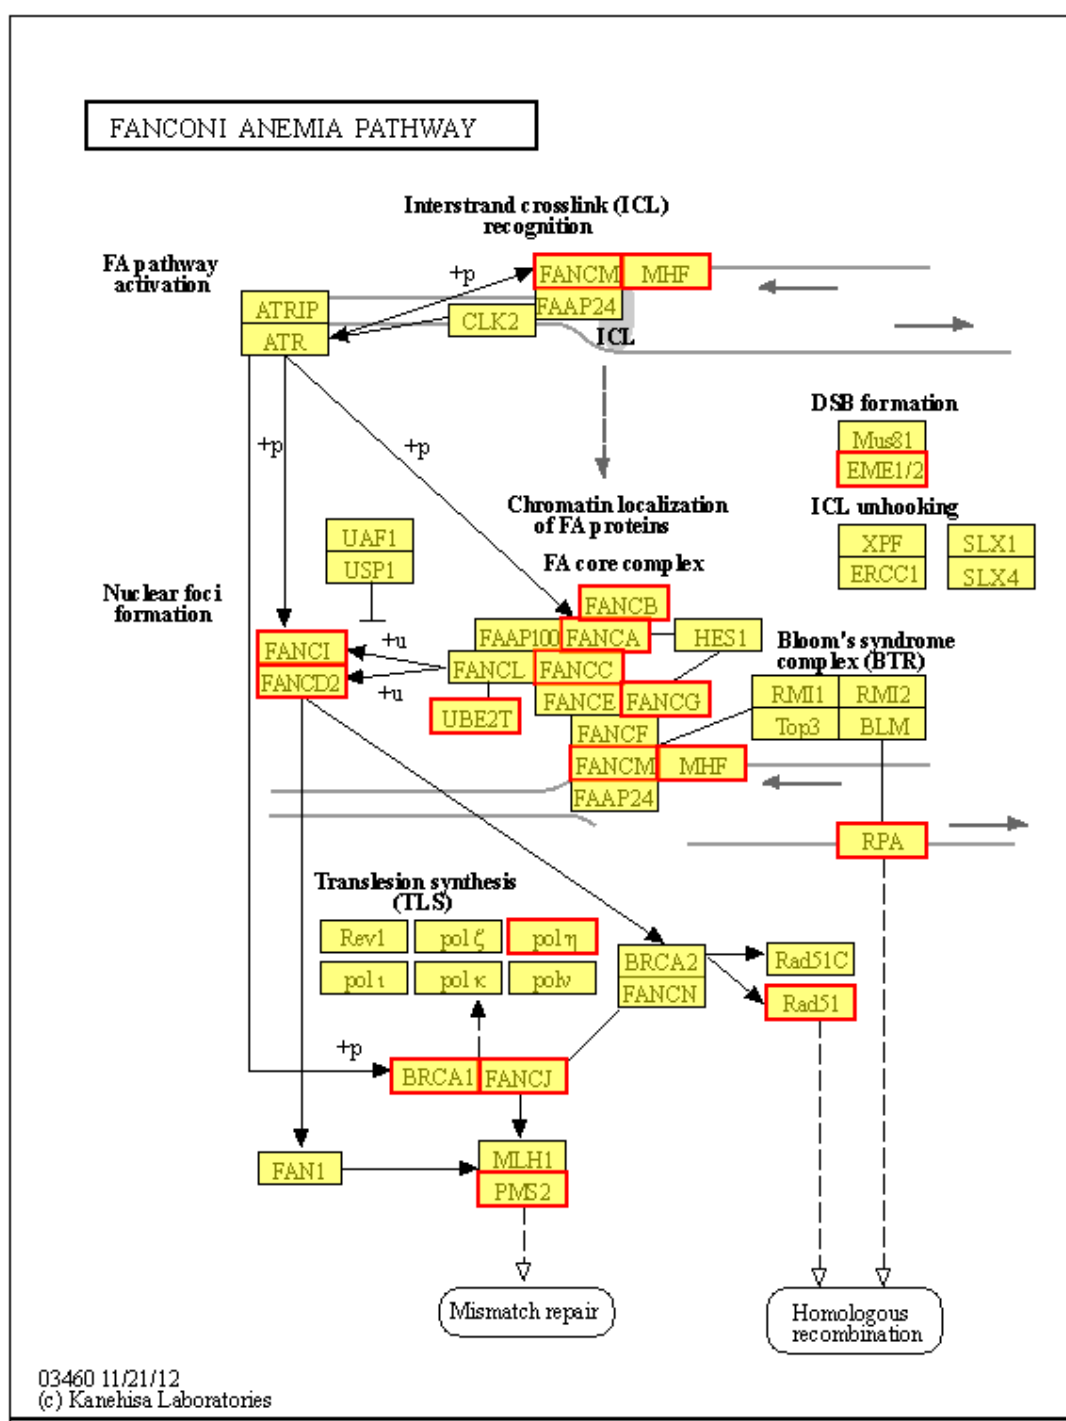

(B)

**Figure S4.** Details of the signaling pathways involved in modules.(A) Details of Herpes simplex virus 1 infection pathway and related up-regulation and down-regulation genes; (B) Details of Fanconi anemia pathway and related up-regulation and down-regulation genes.

**Table S1 Transcriptome Profile of 18 cDNA libraries**

43

| SAMPLE       | RawReads | Clean Reads | Clean Reads Percent | Q30% | Total mapped    | Uniquely mapped | CDS                |
|--------------|----------|-------------|---------------------|------|-----------------|-----------------|--------------------|
| Lung_SD56_1  | 53146554 | 52566676    | 98.9%               | 91.4 | 50348605(95.8%) | 47164508(89.7%) | 52240657.0(70.7%)  |
| Lung_ SD56_2 | 53212994 | 52615142    | 98.9%               | 91.2 | 50238054(95.5%) | 47843180(90.9%) | 52154841.0(70.3%)  |
| Lung_ SD56_3 | 53307084 | 52756724    | 99.0%               | 91.4 | 50443422(95.6%) | 47909895(90.8%) | 53155786.0(71.0%)  |
| Lung_CA09_1  | 53062352 | 52331376    | 98.6%               | 90.2 | 49578641(94.7%) | 46892214(89.6%) | 51168736.0(70.1%)  |
| Lung_ CA09_2 | 53315812 | 52788194    | 99.0%               | 91.7 | 49662285(94.1%) | 46977241(89.0%) | 49972826.0(68.9%)  |
| Lung_ CA09_3 | 53120896 | 52617316    | 99.1%               | 92.0 | 50302265(95.6%) | 47608152(90.5%) | 53701875.0(71.5%)  |
| Lung_con_1   | 52604088 | 51936712    | 98.7%               | 94.0 | 49910648(96.1%) | 46831341(90.2%) | 48737823.0(68.0%)  |
| Lung_con_2   | 47144746 | 46541456    | 98.7%               | 94.0 | 44688267(96.0%) | 42000270(90.2%) | 44211373.0(68.2%)  |
| Lung_con_3   | 48534990 | 47880950    | 98.7%               | 93.9 | 45991411(96.1%) | 43541960(90.9%) | 44319805.0(67.1%)  |
| RAW_ SD56_1  | 49532908 | 48881004    | 98.7%               | 92.8 | 43802836(89.6%) | 41018374(83.9%) | 48260720.0(73.2%)  |
| RAW_ SD56_2  | 50516272 | 49835386    | 98.7%               | 92.9 | 44244362(88.8%) | 41399847(83.1%) | 48945530.0(73.4%)  |
| RAW_ SD56_3  | 47781244 | 47106910    | 98.6%               | 92.6 | 41981169(89.1%) | 39395090(83.6%) | 46642537.0(73.5%)  |
| RAW_ CA09_1  | 47438302 | 46738398    | 98.5%               | 93.0 | 43018095(92.0%) | 40211896(86.0%) | 49907335.0(75.4%)  |
| RAW_ CA09_2  | 48729094 | 47862316    | 98.2%               | 92.5 | 44090155(92.1%) | 41198705(86.1%) | 51002728.0(75.3%)  |
| RAW_CA09_3   | 46360036 | 45669944    | 98.5%               | 93.2 | 42239428(92.5%) | 39487312(86.5%) | 49595575.0(76.0 %) |
| RAW_con_1    | 45842734 | 45148086    | 98.5%               | 92.8 | 42524553(94.2%) | 39921487(88.4%) | 47702254.0(73.7%)  |
| RAW_con_2    | 53672672 | 52976794    | 98.7%               | 93.2 | 49898508(94.2%) | 46836772(88.4%) | 55503054.0(73.3%)  |
| RAW_con_3    | 49170826 | 48474162    | 98.6%               | 92.6 | 45447559(93.8%) | 42660584(88.0%) | 51177175.0(73.9%)  |

Raw reads: The original sequence data were counted in four units, and the number of sequencing sequences in each file was counted.

44

Clean reads: The number of sequenced data after filtering.

45

Clean reads percent: The ratio of clean reads in raw reads.

46

Q30: The percentage of bases with sequencing quality above 99.9% to total bases.

47

Total mapped: The number of clean reads that can be mapped to the genome.

48

Uniquely mapped: The number of clean reads with unique alignment positions on the reference sequence

49

CDS: The reads distributed in protein coding regions

50
